# Supplementary material
Source: publisher figshare collection journal article supplement (https://gsapubs.figshare.com/ndownloader/files/35980805)
Supplement: Supplementary file 1 [file 35980805]

Petermann, H., Lyson, T.R., Miller, I.M., and Hagadorn, J.W., 2022, Crushed turtle shells: Proxies for lithification and burial depth histories: Geosphere, v. 18, <https://doi.org/10.1130/GES02513.1>.

**Table S3.** Different surface porosity values used to estimate burial depth.

| **Porosity** | **Sand-dominated** | **Silt-dominated** |
| --- | --- | --- |
| minimum | 35% | 65% |
| maximum | 45% | 78% |
| very high | 55% | 85% |
